# Supplementary material for: 2,3-Bis(2-pyridyl)thieno[3,4-b]pyrazine and its ruthenium(ii) complexes: a new bidentate bridging ligand for enhanced metal–metal communication
Source: Royal Society of Chemistry journal article supplement (doi:10.1039/d4dt02495h), 2024-01-01
Supplement: d4dt02495h1.pdf [file d4dt02495h1.pdf]

## SUPPORTING INFORMATION

### 2,3-Bis(2-pyridyl)thieno[3,4-*b*]pyrazine and Its Ruthenium(II) complexes: A New Bidentate Bridging Ligand for Enhanced Metal-Metal Communication

Kristine L. Konkol, Wyatt D. Wilcox, and Seth C. Rasmussen\*

Department of Chemistry and Biochemistry, North Dakota State University, NDSU Dept. 2508, P.O. Box 6050, Fargo, ND 58108-6050, United States. Fax: 1-701-231-8747; Tel: 1-701-231-8831; E-mail: seth.rasmussen@ndsu.edu

#### Table of Contents:

|                                                                                                                                                                                                                                              |    |
|----------------------------------------------------------------------------------------------------------------------------------------------------------------------------------------------------------------------------------------------|----|
| I. <b>Figure S1.</b> $^1\text{H}$ NMR spectra of dpTP in $\text{CDCl}_3$ .....                                                                                                                                                               | S1 |
| II. <b>Figure S2.</b> $^1\text{H}$ NMR spectra of dpTP in <i>d</i> -acetone.....                                                                                                                                                             | S2 |
| III. <b>Figure S3.</b> $^{13}\text{C}$ NMR spectra of dpTP in <i>d</i> -acetone.....                                                                                                                                                         | S2 |
| IV. <b>Figure S4.</b> $^1\text{H}$ NMR spectra of $[(\text{bpy})_2\text{Ru}(\text{dpTP})](\text{PF}_6)_2$ in <i>d</i> <sub>6</sub> -acetone.....                                                                                             | S3 |
| V. <b>Figure S5.</b> $^1\text{H}$ NMR spectra of $[\{(\text{bpy})_2\text{Ru}\}_2(\text{dpTP})](\text{PF}_6)_4$ in <i>d</i> <sub>6</sub> -acetone.....                                                                                        | S3 |
| VI. <b>Figure S6.</b> Unit cell of dpTP (thermal ellipsoids shown at the 50% probability level).....                                                                                                                                         | S4 |
| VII. <b>Figure S7.</b> Unit cell of $[\{(\text{bpy})_2\text{Ru}\}_2(\text{dpTP})]^{4+}$ (thermal ellipsoids shown at the 50% probability level, $\text{PF}_6^-$ counterions, and $\text{CH}_3\text{CN}$ solvent not shown for clarity) ..... | S4 |
| VIII. <b>Table S1.</b> Selected bond distances (Å) of various fused-ring pyrazines.....                                                                                                                                                      | S5 |
| IX. <b>Figure S8.</b> Cyclic voltammogram of $[\{(\text{bpy})_2\text{Ru}\}_2(\text{dpTP})]^{4+}$ in DMF.....                                                                                                                                 | S5 |
| X. <b>References</b> .....                                                                                                                                                                                                                   | S5 |

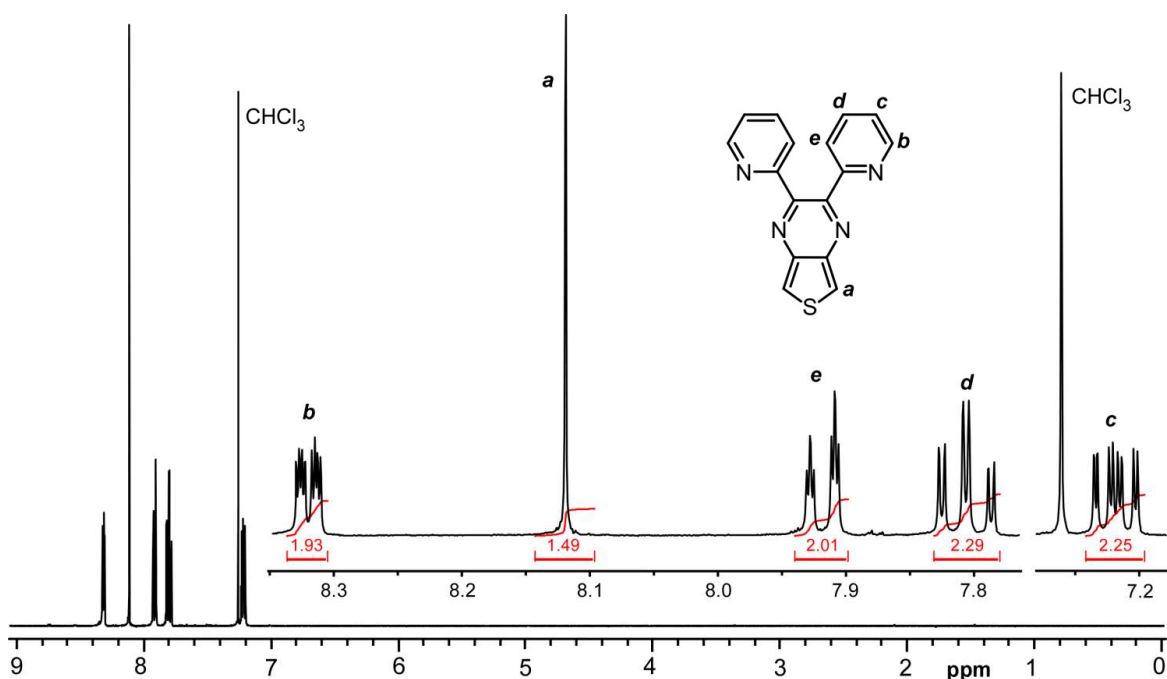

**Figure S1.**  $^1\text{H}$  NMR spectra of dpTP in  $\text{CDCl}_3$

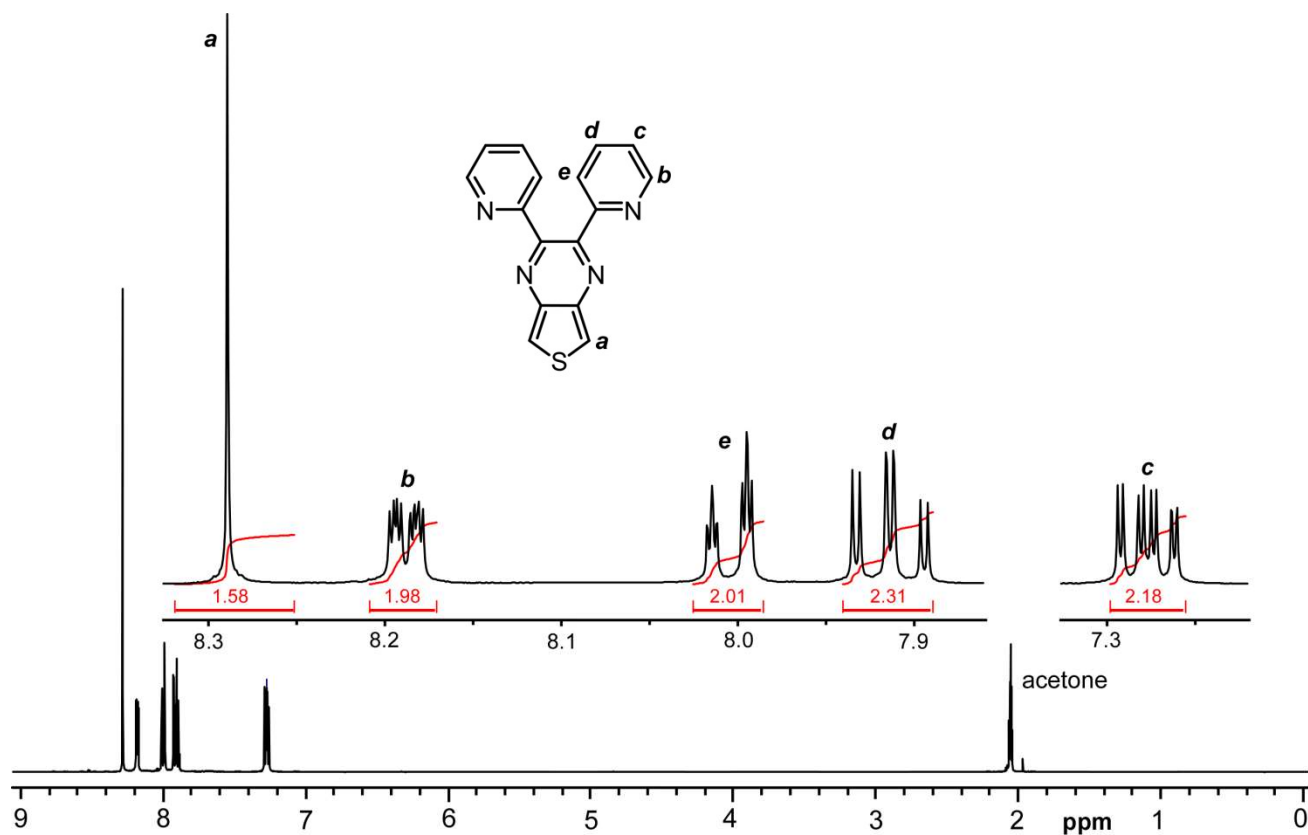

**Figure S2.**  $^1\text{H}$  NMR spectra of **dpTP** in  $d_6$ -acetone

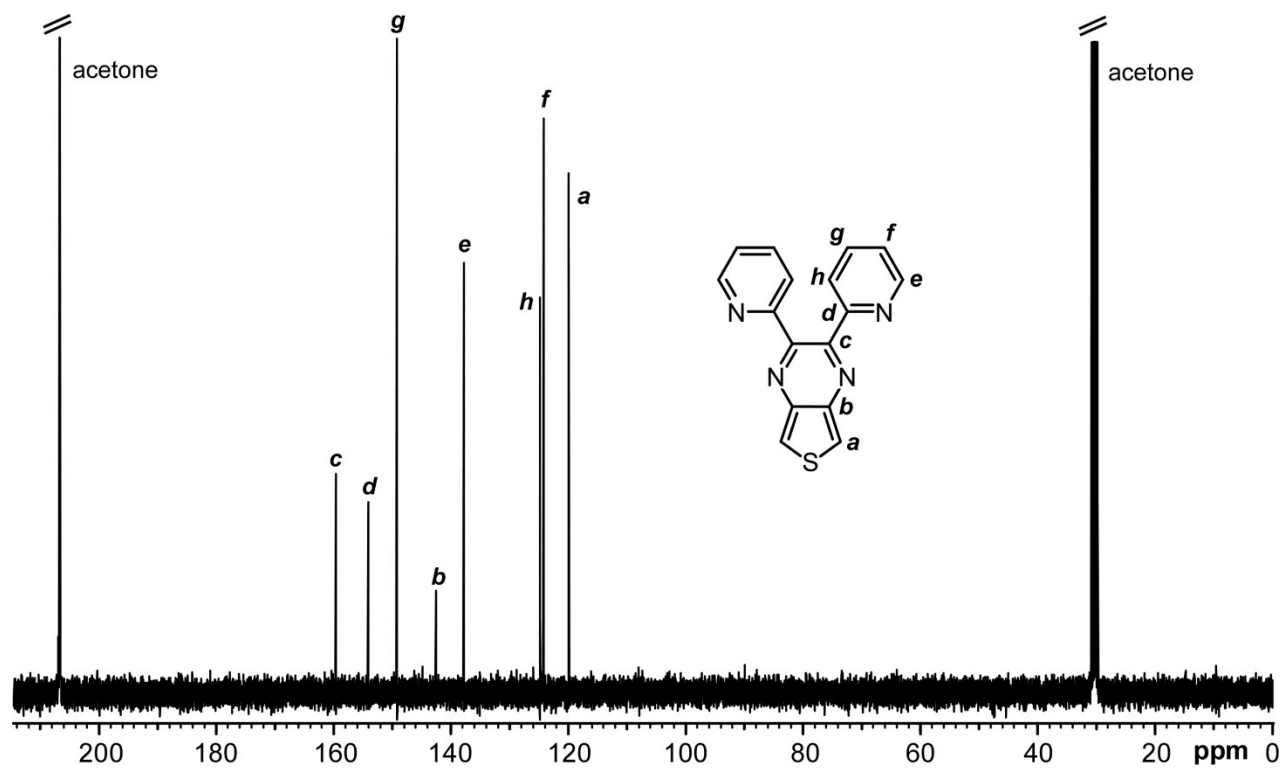

**Figure S3.**  $^{13}\text{C}$  NMR spectra of **dpTP** in  $d_6$ -acetone

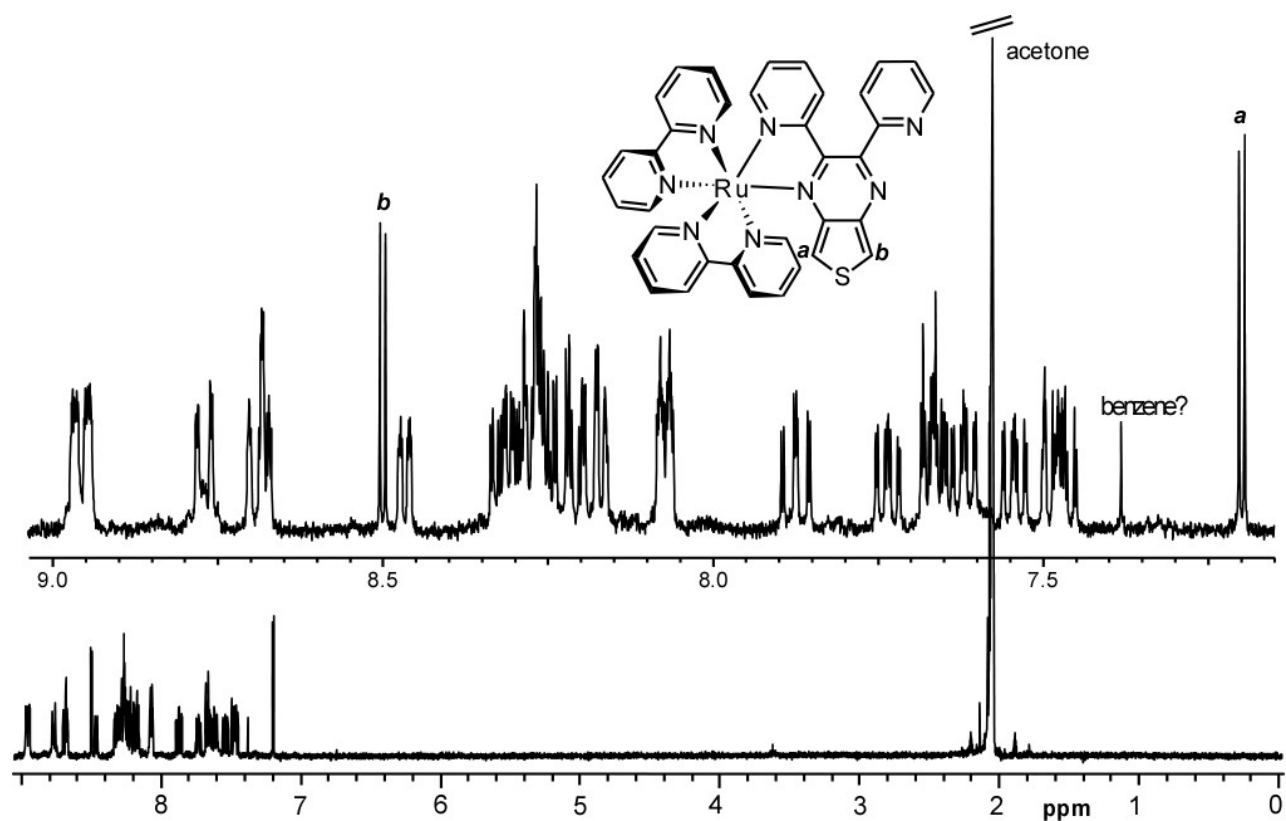

Figure S4.  $^1\text{H}$  NMR spectra of  $[(\text{bpy})_2\text{Ru}(\text{dpTP})](\text{PF}_6)_2$  in  $d_6$ -acetone

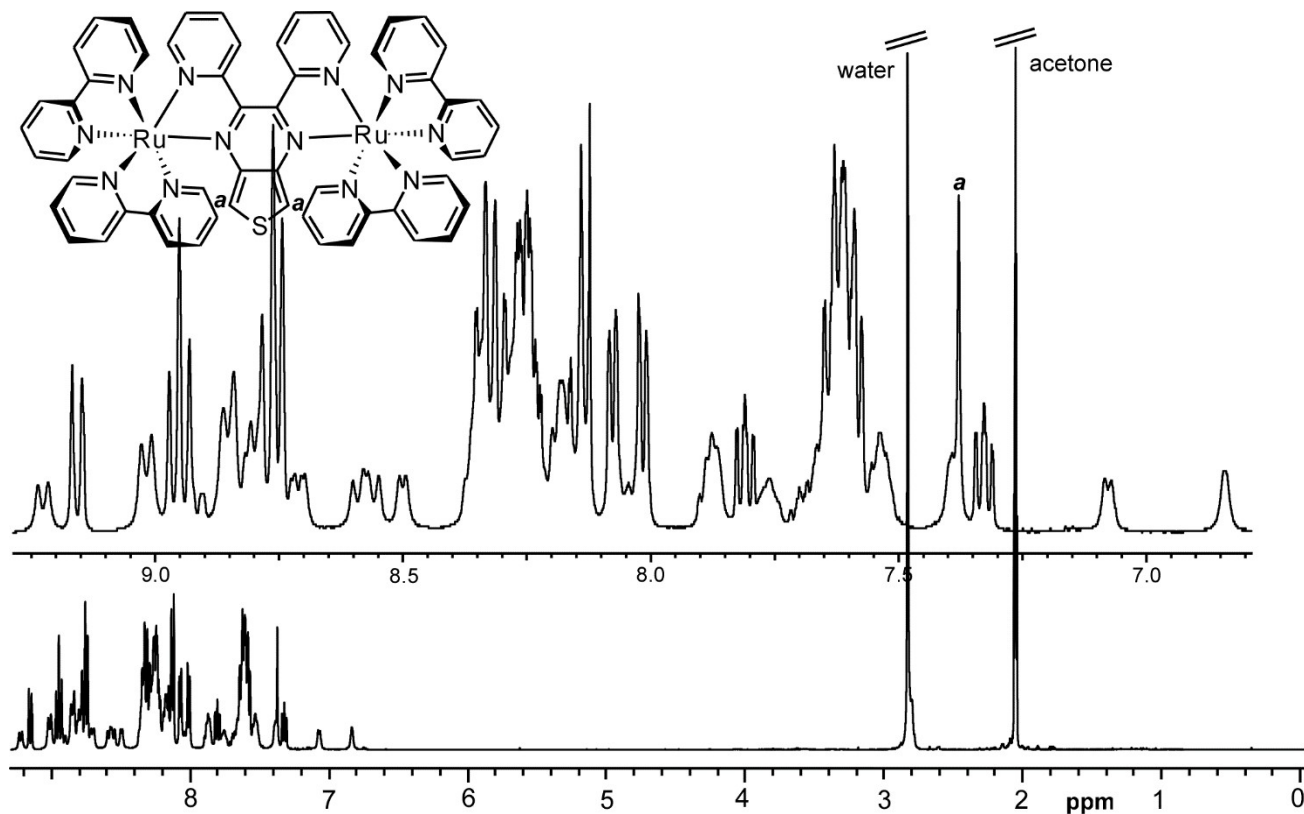

Figure S5.  $^1\text{H}$  NMR spectra of  $[\{(\text{bpy})_2\text{Ru}\}_2(\text{dpTP})](\text{PF}_6)_4$  in  $d_6$ -acetone

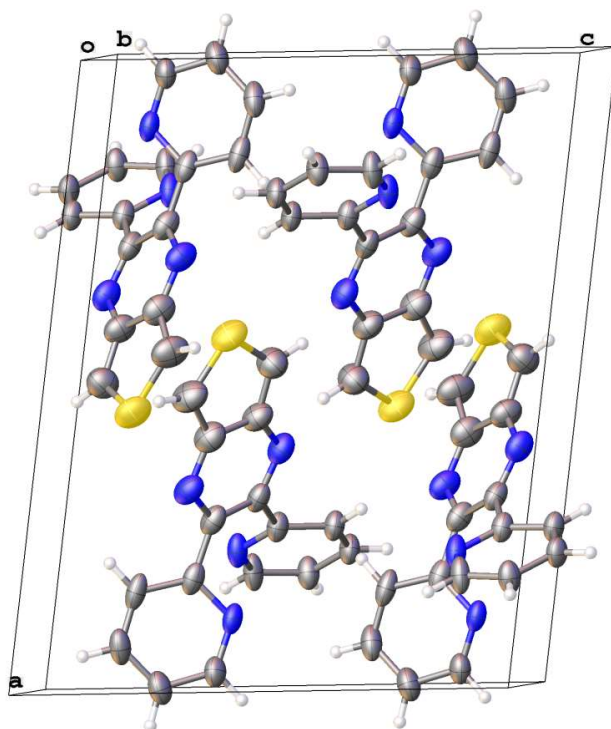

**Figure S6.** Unit cell of dpTP (thermal ellipsoids shown at the 50% probability level)

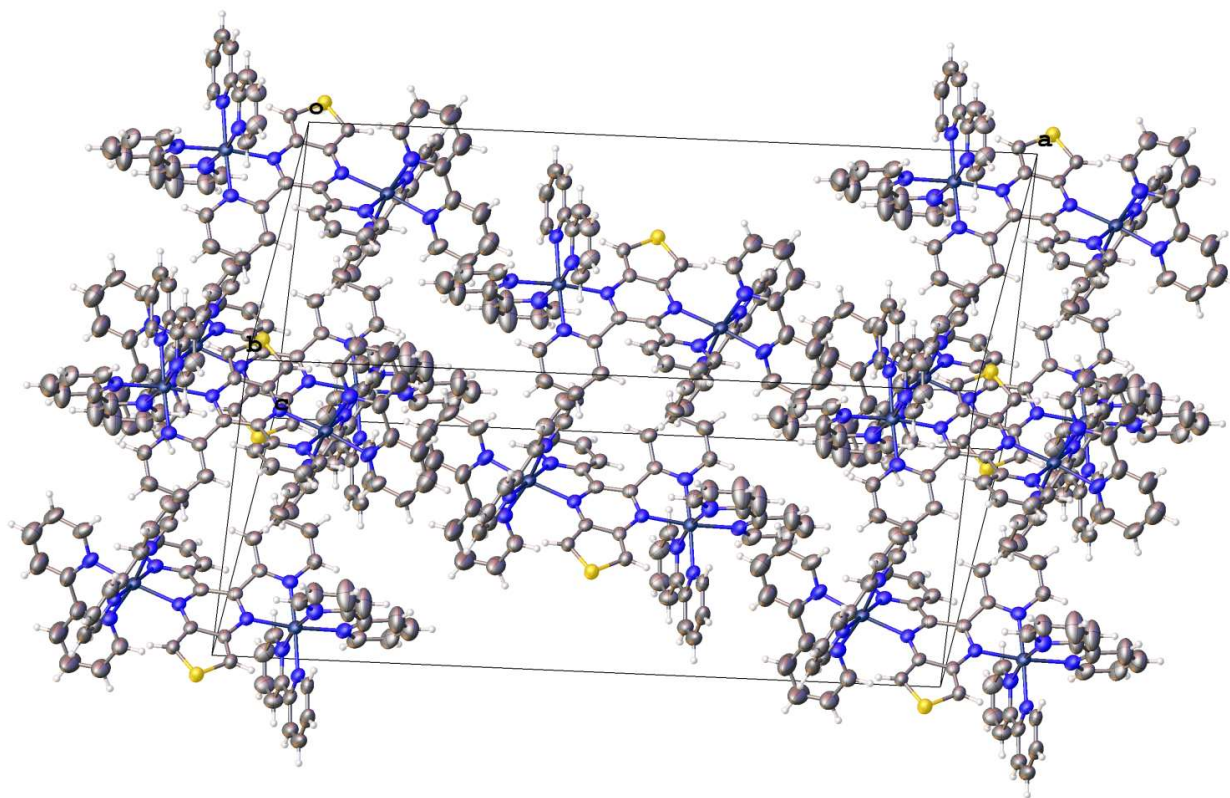

**Figure S7.** Unit cell of  $[\{(\text{bpy})_2\text{Ru}\}_2(\text{dpTP})]^{4+}$  (thermal ellipsoids shown at the 50% probability level,  $\text{PF}_6^-$  counterions, and  $\text{CH}_3\text{CN}$  solvent not shown for clarity)

**Table S1.** Selected bond distances (Å) of various fused-ring pyrazines.

| Parameter | dpTP     | Me <sub>2</sub> TP <sup>a</sup> | dpq <sup>b</sup> |
|-----------|----------|---------------------------------|------------------|
| S1-C1     | 1.688(6) | 1.691(2)                        |                  |
| C1-C2     | 1.365(7) | 1.372(3)                        |                  |
| C2-C3     | 1.432(7) | 1.427(2)                        | 1.407(4)         |
| C2-N1     | 1.374(6) | 1.377(2)                        | 1.368(4)         |
| N1-C5     | 1.300(6) | 1.308(2)                        | 1.317(4)         |
| C5-C6     | 1.468(7) | 1.460(3)                        | 1.436(3)         |
| C5-C7     | 1.488(6) | 1.495(3)                        | 1.485(4)         |
| C7-C8     | 1.401(6) |                                 | 1.389(4)         |
| C8-C9     | 1.376(6) |                                 | 1.382(4)         |
| C9-C10    | 1.378(6) |                                 | 1.377(5)         |
| C10-C11   | 1.384(6) |                                 | 1.375(5)         |
| C11-N3    | 1.324(6) |                                 | 1.340(4)         |
| N3-C7     | 1.335(6) |                                 | 1.338(4)         |

<sup>a</sup>Ref. 1. <sup>b</sup>Ref. 2.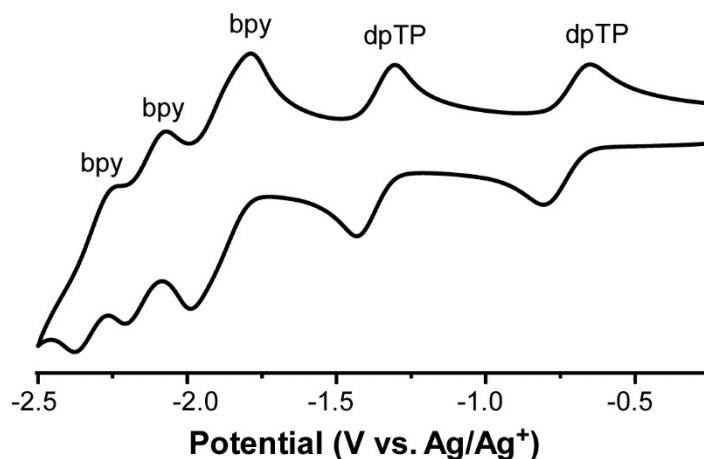**Figure S8.** Cyclic voltammogram of [ {(bpy)<sub>2</sub>Ru} <sub>2</sub>(dpTP) ]<sup>4+</sup> in DMF.

## References

1. D. D. Kenning, K. A. Mitchell, T. A. Calhoun, M. R. Funfar, D. J. Sattler, and S. C. Rasmussen, Thieno[3,4-*b*]pyrazines: Synthesis, Structure, and Reactivity. *J. Org. Chem.* 2002, **67**, 9073-9076.
2. S. C. Rasmussen, M. M. Richter, E. Yi, H. Place, and K. J. Brewer, Synthesis and Characterization of a Series of Novel Rhodium and Iridium Complexes Containing Polypyridyl Bridging Ligands: Potential Uses in the Development of Multimetal Catalysts for Carbon Dioxide Reduction. *Inorg. Chem.* 1990, **29**, 3926-3932.
